# Supplementary material
Source: publisher figshare collection journal article supplement (https://acs.figshare.com/ndownloader/files/5539061)
Supplement: Supplementary file 1 [file 5539061]

## **Supporting information**

### **Substantial Humic Acid Adsorption to Activated Carbon Air Cathodes Produces a Small Reduction in Catalytic Activity**

Wulin Yang<sup>a</sup>, Valerie J. Watson<sup>a</sup>, Bruce E. Logan<sup>\*a</sup>

<sup>a</sup>Department of Civil and Environmental Engineering, The Pennsylvania State University,  
University Park, Pennsylvania 16802, United States

\*Corresponding Author. Telephone: +1 814 863 7908. Fax: +1 814 863 7304. E-mail:  
[blogan@psu.edu](mailto:blogan@psu.edu).

number of pages: 5

number of figures: 4

number of tables: 2

**Table S1.** HA concentrations before and after AC adsorption

| Sample                  | Before<br>(mg-C L <sup>-1</sup> ) | After<br>(mg-C L <sup>-1</sup> ) | Adsorption<br>mass (mg-C) |
|-------------------------|-----------------------------------|----------------------------------|---------------------------|
| 100 mg L <sup>-1</sup>  | 33 ± 2                            | 20 ± 1                           | 1.4 ± 0.1                 |
| 1000 mg L <sup>-1</sup> | 330 ± 20                          | 190 ± 1                          | 14 ± 2                    |

**Table S2.** HA concentration and loading of back wash effluent

| Effluent volume<br>(mL) | Concentration<br>(mg-C L <sup>-1</sup> ) | Mass<br>(mg-C) |
|-------------------------|------------------------------------------|----------------|
| 30                      | 12 ± 1                                   | 0.36 ± 0.04    |

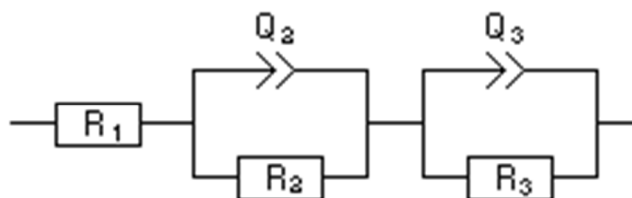

**Figure S1.** Equivalent circuit for EIS spectra ( $R_1$ : solution resistance;  $R_2$ : charge transfer resistance;  $R_3$ : diffusion resistance;  $Q_2$ ,  $Q_3$ : constant phase elements).

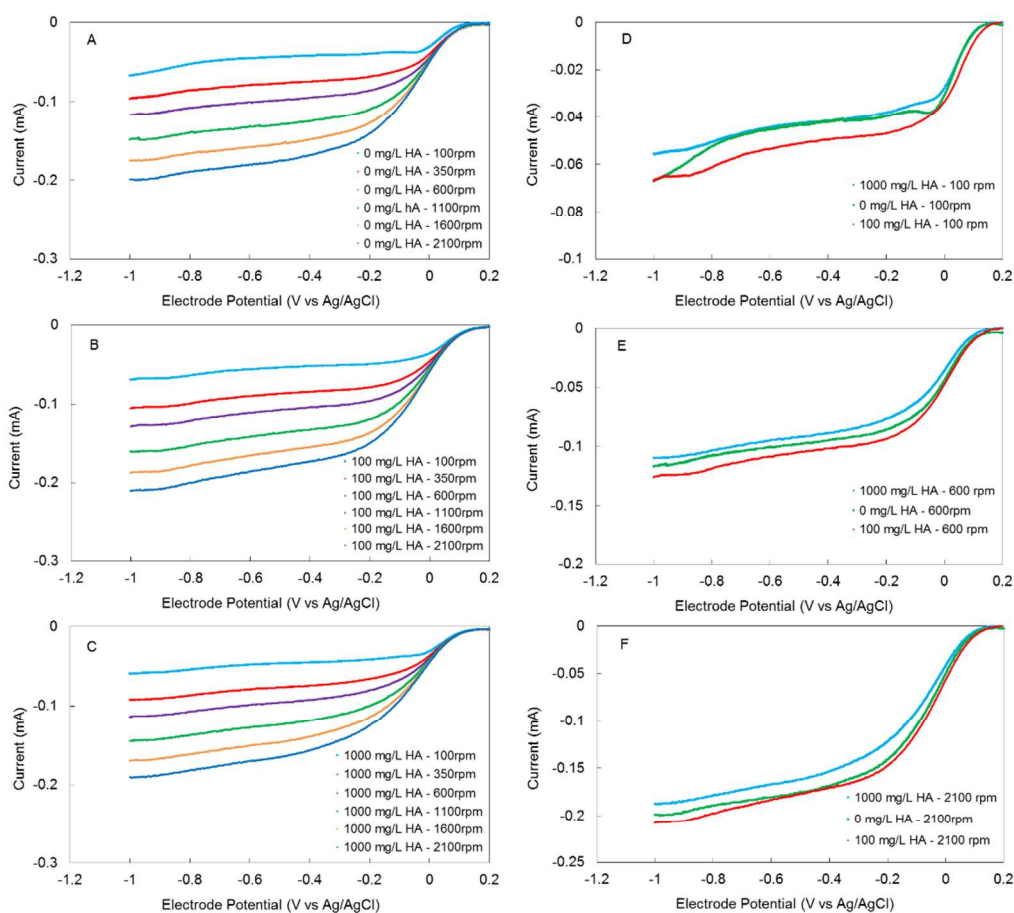

**Figure S2.** (A-C) Current-potential curves at different rotation rates for AC adsorbed with 0, 100 and 1000 mg L<sup>-1</sup> HA solutions. (D-E) Current-potential curves at 100, 600 and 2100 rpm for AC adsorbed with 0, 100 and 1000 mg L<sup>-1</sup> HA solutions.

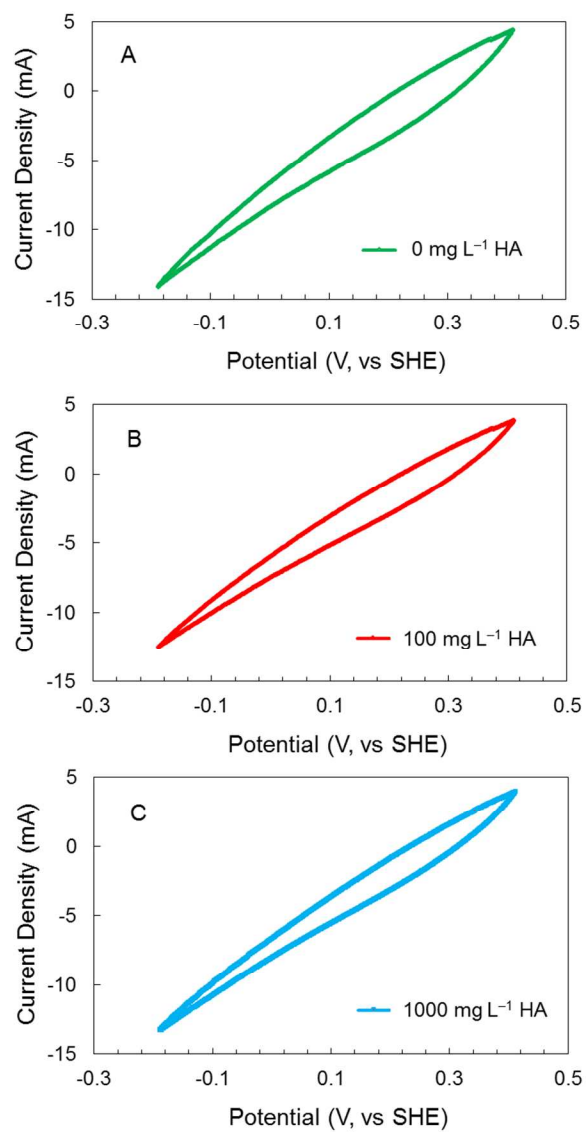

**Figure S3.** (A-C) Cyclic voltammetry curves of activated carbon cathode in 0, 100 and 1000 mg L<sup>-1</sup> HA solution buffered with 50 mM PBS.

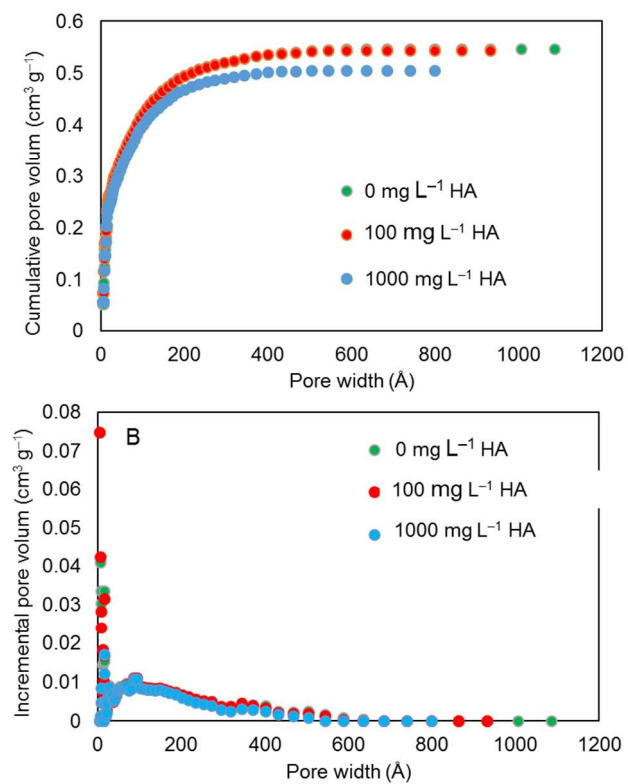

**Figure S4.** (A) Cumulative pore volume (B) pore size distributions of ACs treated with 0, 100, 1000  $\text{mg/L}$  HA solutions.
